# Supplementary material
Source: publisher figshare collection journal article supplement (https://sage.figshare.com/ndownloader/files/23553680)
Supplement: Supplementary file 1 [file 23553680]

## Sheet: Foglio1
Shaping Mediterranean landscapes: the cultural impact of anthropogenic fires in Tyrrhenian southern Tuscany during the Iron and Middle Ages (800-450 BC / AD 650-1300) Mauro Paolo Buonincontri, Pierluigi Pieruccini, Davide Susini, Carmine Lubritto, Paola Ricci, Fabian Rey, Willy Tinner, Daniele Colombaroli, Ruth Drescher-Schneider, Luisa Dallai, Lorenzo Marasco, Giulio Poggi, Giovanna Bianchi, Ric…
Supplementary Table 1. Sediment charcoal remains from the palaeochannel of the Pecora river. Absolute values grouped by sedimentary facies and samples. For each taxon the number of specimens for classes of size and the total amount are reported.
Sedimentary facies	3					4.1				4.2																														4.3
Sample code	6					7				1				2			3				4				1.4		2.2				2.3				2.4					1.1			1.2			2.1
Classes of charcoal size (mm)	1	2	5	Tot	Tot facies	2	5	Tot	Tot facies	1	2	5	Tot	2	5	Tot	1	2	5	Tot	1	2	5	Tot	1	Tot	1	2	5	Tot	1	2	5	Tot	1	2	5	Tot	Tot facies	1	2	Tot	1	2	Tot	1	2	5	Tot
Alnus							10	10	10																		2			2	2	7	6	15					17
Arbutus unedo	2	2		4	4																										2		3	5					5
Cistus	1		2	3	3
Crataegus			1	1	1
Erica														1	1	2	2	2	1	5													2	2					9
Euonymus	4	1	3	8	8
Fraxinus	3	5	3	11	11	1	3	4	4	3	1	1	5	1		1	8	5	5	18	1			1							8	7	3	18	5	2	2	9	52				1		1	5	3	6	14
Fraxinus cf. ornus																	1		1	2												3	6	9					11
Fraxinus cf. oxycarpa		1	1	2	2		1	1	1						1	1		1	6	7	1			1				1		1	1	2	3	6	5	8	3	16	32
Maloideae										1			1														2	2	1	5					1			1	7							3	1		4
Populus		1		1	1																											2	5	7		1		1	8
Populus/Salix																	1	1	1	3	11		1	12			2			2	1	2		3	2			2	22				1		1
Prunus																					2	1	1	4									3	3	1	1		2	9
Quercus	2	2	1	5	5												4			4	2			2							2		1	3	1		1	2	11		1	1				4	4	1	9
Quercus cf. cerris	2	1	1	4	4																								1	1	1	1	8	10					11		2	2					6	60	66
Quercus cf. ilex																			1	1	1			1															2
Quercus cf. pubescens			1	1	1																																											3	3
Quercus deciduous type		1		1	1																											1	1	2		1		1	3							3	2	5	10
Salix																	2			2	2	2	4	8															10
Sorbus																																3		3					3
Sorbus cf. aucuparia											1		1																				1	1					2
Ulmus	2	3	1	6	6					15	11	11	37																		3	3	16	22	1		1	2	61							1	2		3
Vitis vinifera		2	2	4	4																											1	9	10					10
Dicotyledon														1		1																							1				1		1
Monocotyledon																									3	3													3
Total	16	19	16	51	51	1	14	15	15	19	13	12	44	3	2	5	18	9	15	42	20	3	6	29	3	3	6	3	2	11	20	32	67	119	16	13	7	36	289		3	3	3		3	16	18	75	109
Undetermined	4	8	3	15	15					1	4	1	6	2	1	3	2		1	3					5	5		1		1		1		1	4			4	23	1		1		6	6	4	7		11
[truncated: 6 more columns]
